# Supplementary material
Source: publisher figshare collection journal article supplement (https://asha.figshare.com/articles/dataset/_/24905046)
Supplement: Supplementary file 2 [file 1]

**Supplemental Material S2.** Mean descriptive data and statistical results of the microlinguistic variables extracted from discourse samples distinguishing the AD and the WWBI groups.

| Linguistic variable             | Category                  | AD ( <i>n</i> = 9)     |                   | WWBI ( <i>n</i> = 10)  |                  | <i>t</i> test ( <i>p</i> value) | Corrected <i>p</i> value* |
|---------------------------------|---------------------------|------------------------|-------------------|------------------------|------------------|---------------------------------|---------------------------|
|                                 |                           | <i>M</i> ( <i>SD</i> ) | Minimum-maximum   | <i>M</i> ( <i>SD</i> ) | Minimum-Maximum  |                                 |                           |
| Connector ratio                 | Connector measures        | 0.09 (0.04)            | (0.023, 0.15)     | 0.12 (0.02)            | (0.08, 0.14)     | -1.31 (.20)                     | .09                       |
| Sentences                       | Descriptive measures      | 26.66 (11.99)          | (9, 47)           | 50.9 (22.09)           | (19, 96)         | -2.92 (.01)                     | <b>.013</b>               |
| Words per sentence              | Descriptive measures      | 5.29 (1.24)            | (3.77, 7.88)      | 5.25 (0.43)            | (4.79, 6.17)     | 0.092 (.92)                     | .19                       |
| Words                           | Descriptive measures      | 147.88 (82.86)         | (34, 276)         | 267.80 (117.81)        | (94, 506)        | -2.54 (.02)                     | <b>.02</b>                |
| Preposition diversity           | Lexical diversity         | 0.66 (0.22)            | (0.36, 1)         | 0.464 (0.11)           | (0.28, 0.66)     | 2.4 (.02)                       | <b>.02</b>                |
| Pronoun diversity               | Lexical diversity         | 0.54 (0.16)            | (0.38, 0.8)       | 0.41 (0.09)            | (0.29, 0.55)     | 2.35 (.03)                      | <b>.04</b>                |
| Relative clauses                | Lexical diversity         | 0.09 (0.05)            | (0, 0.15)         | 0.06 (0.04)            | (0.01, 0.12)     | 1.96 (.06)                      | .05                       |
| Indicative present ratio        | Lexical diversity         | 0.47 (0.2)             | (0.11, 0.9)       | 0.30 (0.16)            | (0.06, 0.50)     | 1.81 (.08)                      | .05                       |
| Noun diversity                  | Lexical diversity         | 0.73 (0.179)           | (0.43, 1)         | 0.65 (0.07)            | (0.56, 0.76)     | 1.35 (.19)                      | .08                       |
| Type-to-token ratio (TTR)       | Lexical diversity         | 0.68 (0.12)            | (0.48, 0.91)      | 0.63 (0.04)            | (0.58, 0.70)     | 1.25 (.22)                      | .09                       |
| Content density                 | Lexical diversity         | 1.37 (0.30)            | (0.94, 1.83)      | 1.27 (0.16)            | (0.92, 1.46)     | 0.93 (.38)                      | .13                       |
| Function-to-content words ratio | Lexical diversity         | 0.76 (0.17)            | (0.54, 1.06)      | 0.80 (0.12)            | (0.68, 1.08)     | -0.58 (.56)                     | .15                       |
| Content word diversity          | Lexical diversity         | 0.74 (0.10)            | (0.58, 0.90)      | 0.72 (0.053)           | (0.64, 0.79)     | 0.49 (.62)                      | .15                       |
| Concreteness mean               | Psycholinguistic measures | 4.38 (0.34)            | (3.8, 4.69)       | 4.57 (0.18)            | (4.32, 4.85)     | -1.50 (.15)                     | .07                       |
| Imageability mean               | Psycholinguistic measures | 4.74 (0.26)            | (4.29, 4.98)      | 4.86 (0.12)            | (4.71, 5.04)     | -1.22 (.27)                     | .10                       |
| Acquisition age mean            | Psycholinguistic measures | 2.92 (0.24)            | (2.53, 3.35)      | 2.90 (0.16)            | (2.62, 3.08)     | 0.21 (.84)                      | .17                       |
| Familiarity mean                | Psycholinguistic measures | 5.31 (0.069)           | (5.10, 5.41)      | 5.31 (0.08)            | (5.17, 5.47)     | 0.18 (.85)                      | .18                       |
| Brunet                          | Readability measures      | 10.53 (1.64)           | (7.39, 12.45)     | 11.97 (0.99)           | (9.96, 13.07)    | -2.35 (.03)                     | <b>.03</b>                |
| Honore                          | Readability measures      | 876.65 (579.63)        | (416.48, 2373.79) | 721.06 (89.96)         | (630.35, 941.03) | 0.84 (.41)                      | .13                       |
| Flesch                          | Readability measures      | 90.66 (6.73)           | (82.91, 101.59)   | 90.02 (4.97)           | (83.36, 97.56)   | 0.24 (.81)                      | .17                       |

|                            |                                  |                          |                            |                          |                           |             |             |
|----------------------------|----------------------------------|--------------------------|----------------------------|--------------------------|---------------------------|-------------|-------------|
| Frazier                    | Syntax complexity                | 6.24 (0.40)              | (5.38, 6.72)               | 6.39 (0.27)              | (5.96, 7)                 | -0.95 (.35) | .12         |
| Yngve                      | Syntax complexity                | 1.59 (0.14)              | (1.35, 1.83)               | 1.57 (0.05)              | (1.49, 1.68)              | 0.28 (.78)  | .16         |
| Verbal time mood diversity | Temporal lexicon                 | 3.33 (0.71)              | (2, 4)                     | 4.6 (1.07)               | (3, 7)                    | -2.99 (.01) | <b>.006</b> |
| Content word frequency     | Word frequency                   | 627251.22<br>(334455.33) | (259314.09,<br>1235414.37) | 519957.64<br>(152240.29) | (204637.46,<br>742153.80) | 0.92 (.37)  | .12         |
| Verbs                      | Word morphosyntactic information | 0.26 (0.03)              | (0.22, 0.31)               | 0.23 (0.02)              | (0.20, 0.27)              | 1.77 (.11)  | .06         |
| Noun ratio                 | Word morphosyntactic information | 0.17 (0.04)              | (0.11, 0.2)                | 0.19 (0.02)              | (0.17, 0.22)              | -1.62 (.14) | .06         |
| Inflected verbs            | Word morphosyntactic information | 0.81 (0.06)              | (0.74, 0.91)               | 0.78 (0.05)              | (0.71, 0.88)              | 1.11 (.28)  | .11         |
| Pronoun ratio              | Word morphosyntactic information | 0.165 (0.04)             | (0.08, 0.23)               | 0.15 (0.03)              | (0.09, 0.20)              | 0.83 (.42)  | .14         |
| Infinitive verbs           | Word morphosyntactic information | 0.107 (0.04)             | (0.05, 0.2)                | 0.10 (0.04)              | (0.03, 0.15)              | 0.07 (.94)  | .20         |

*Note.* AD = Alzheimer's disease group; WWBI = women without brain injury; *M* = mean; *SD* = standard deviation.

\*Corrected *p* value using the Benjamini-Hochberg procedure.
